# Supplementary material for: Ceramide Synthase 1 Inhibits Brain Metastasis of Non-Small Cell Lung Cancer by Interacting with USP14 and Downregulating the PI3K/AKT/mTOR Signaling Pathway
Source: Cancers (Basel). 2023 Mar 27;15(7):1994. doi: 10.3390/cancers15071994 (PMC10093008; doi:10.3390/cancers15071994)
Supplement: Supplementary file 1 [file cancers-15-01994-s001.zip › cancers-2234878-supplementary.pdf]

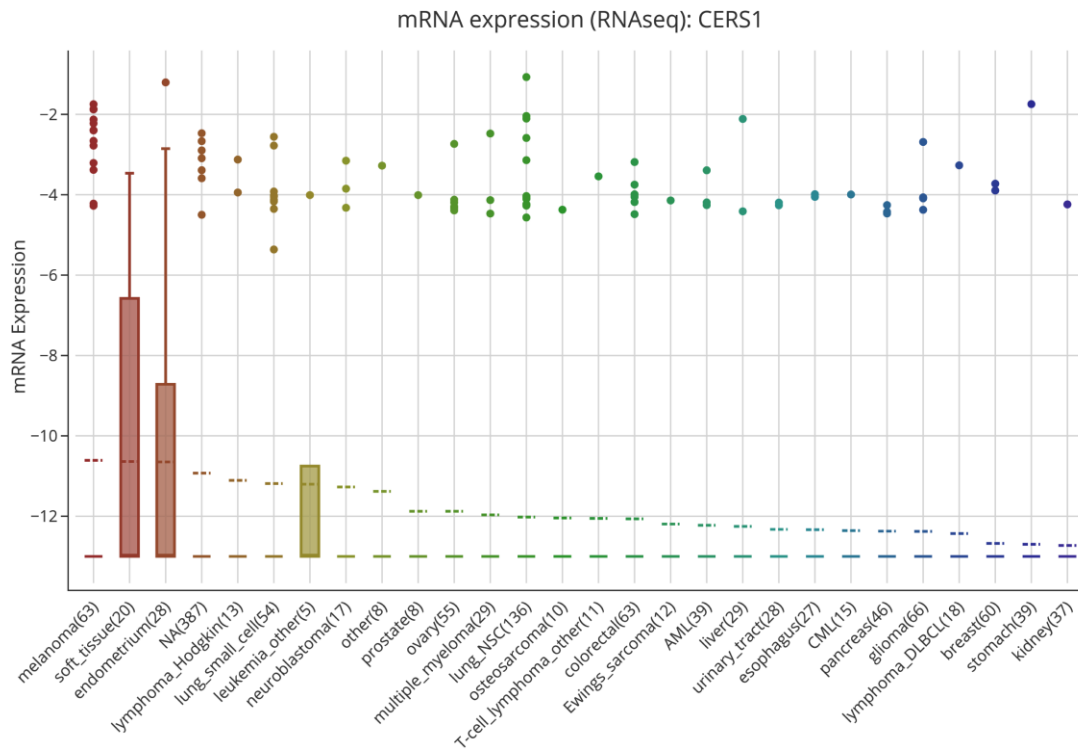

**Figure S1.** CCLE dataset was used to analyze CERS1 expression in 28 malignant tumor cells.

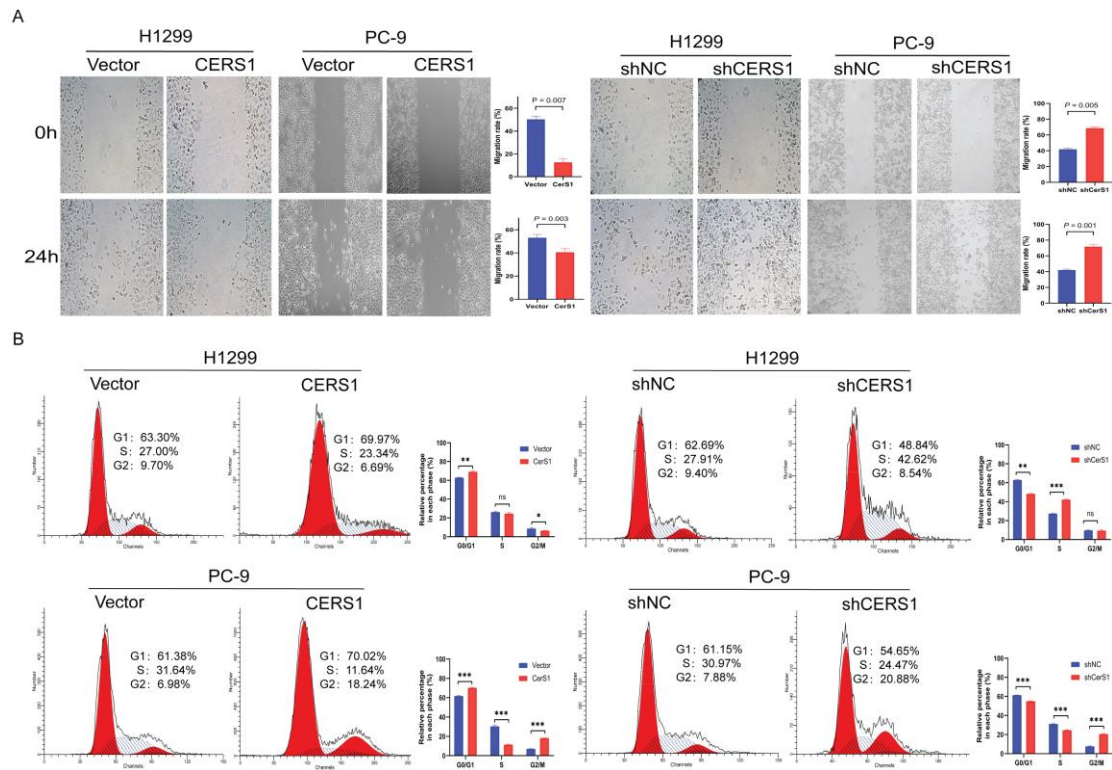

**Figure S2.** Effect of CERS1 on NSCLC cell migration and cell cycle. (A) Migration ability of cells following CERS1 transfection was tested via wound-healing assay. (B) Cell cycle was tested via flow cytometry after propidium iodide staining, and the data were analyzed using ModFit LT program.

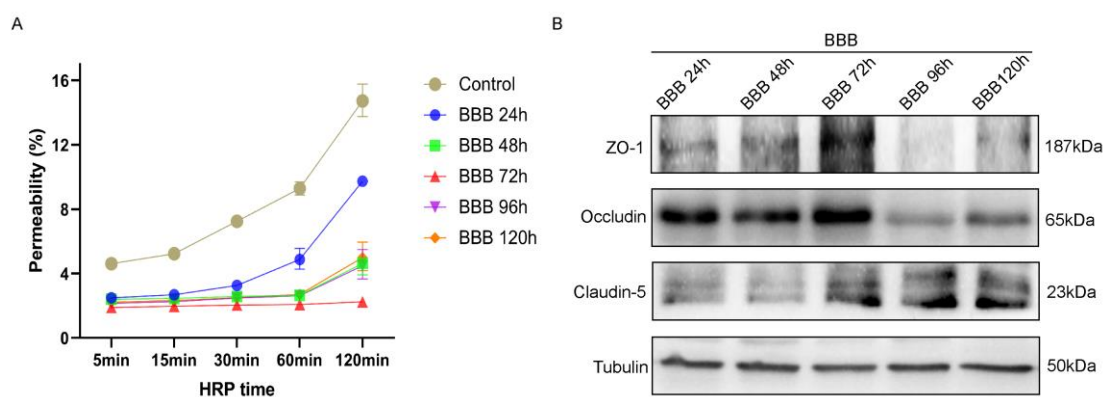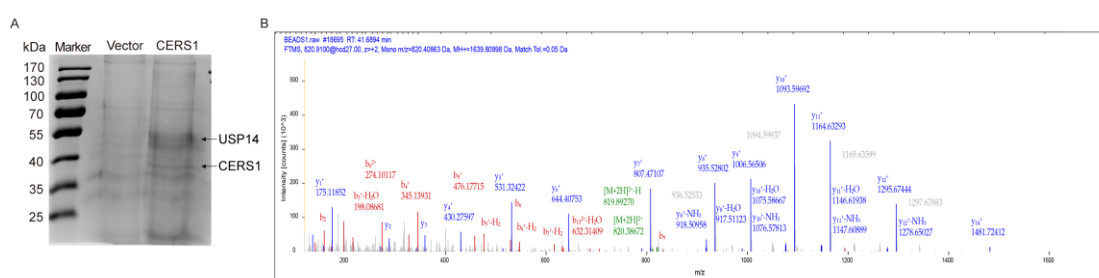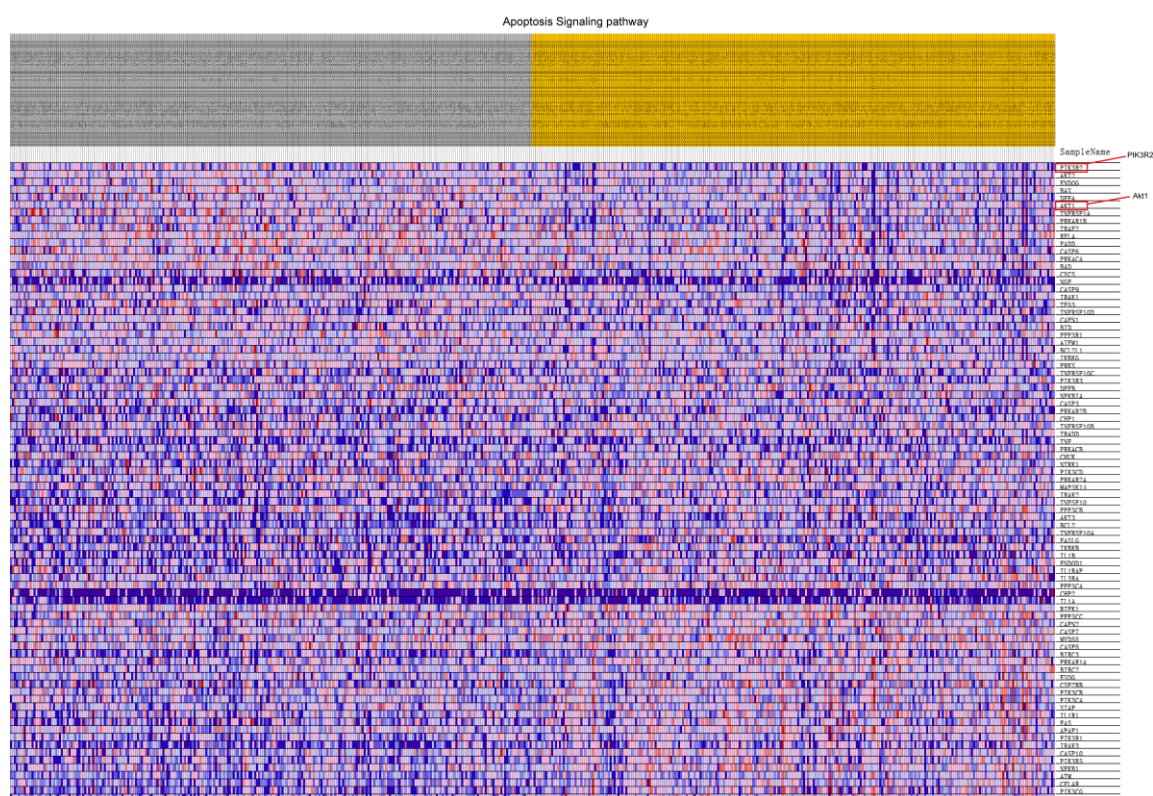

**Table S1.** The primer sequences used in this part of the experiment are as follows:.

| Gene name | Primer sequence (5' to 3')                                          |
|-----------|---------------------------------------------------------------------|
| CERS1     | Forward: CCTCCAGCCCAGAGAT<br>Reverse: AGAAGGGGTAGTCGGTG             |
| CERS2     | Forward: CCAGGTAGAGCGTTGGTT<br>Reverse: CCAGGGTTTATCCACAATGAC       |
| CERS3     | Forward: CCTGGCTGCTATTAGTCTGAT<br>Reverse: TCACGAGGGTCCCACT         |
| CERS4     | Forward: CTGGTGGTACCTCTTGGAGC<br>Reverse: CGTCGCACACTTGCTGATAC      |
| CERS5     | Forward: CAAGTATCAGCGGCTCTGT<br>Reverse: ATTATCTCCCACTCTCAAAGA      |
| CERS6     | Forward: AAGCAACTGGACTGGGATGTT<br>Reverse: AATCTGACTCCGTAGGTAAATACA |
| GADPH     | Forward: AATCCCATCACCATCTTCCAG<br>Reverse: GAGCCCCAGCCTTCTCCAT      |

**Table S2.** The specific shRNA sequence construction framework is as follows:.

| Name     |         | 5'          | STEMP                      | Loop   | STEMP                     | 3'      |
|----------|---------|-------------|----------------------------|--------|---------------------------|---------|
| CERS1 #1 | Forward | CCGG        | GTGCTCTTCCTGCACGAT<br>ATC  | CTCGAG | GATATCGTGCAGGAAGAG<br>CAC | TTTTTTG |
|          | Reverse | AATTCAAAAAA | GTGCTCTTCCTGCACGAT<br>ATC  | CTCGAG | GATATCGTGCAGGAAGAG<br>CAC |         |
| CERS1 #2 | Forward | CCGG        | GCTGCTGCTCACCCCTTAT<br>GAA | CTCGAG | TTCATAAGGGTGAGCAGC<br>AGC | TTTTTTG |
|          | Reverse | AATTCAAAAAA | GCTGCTGCTCACCCCTTAT<br>GAA | CTCGAG | TTCATAAGGGTGAGCAGC<br>AGC |         |
| CERS1 #3 | Forward | CCGG        | GCTTCTATGGCCACTCCA<br>TCT  | CTCGAG | AGATGGAGTGGCCATAGA<br>AGC | TTTTTTG |
|          | Reverse | AATTCAAAAAA | GCTTCTATGGCCACTCCA<br>TCT  | CTCGAG | AGATGGAGTGGCCATAGA<br>AGC |         |

**Table S3.** PCR amplification primers for overexpression CERS1 were showed in the following table:.

| Id            | Seq (5'→3')                                                    |
|---------------|----------------------------------------------------------------|
| CERS1-Forward | GAGGATCCCCGGGT <u>ACCGGTCGCCACCA</u> TGCCCCGAGAGCG<br>CTTGGAAG |
| CERS1-Reverse | TCACCATGGTGGCG <u>GGATCC</u> AGCCCAGCAAAGCCGAGTGA              |
